# Supplementary material for: Growth and shell hardness of the apple snail Pomacea flagellata Say, 1829, reared at three calcium concentrations
Source: PeerJ. 2023 Feb 9;11:e14840. doi: 10.7717/peerj.14840 (PMC9922495; doi:10.7717/peerj.14840)
Supplement: Supplemental Information 1 — Length and weight growth data during the experiment [file peerj-11-14840-s001.xlsx]

## Sheet: Hoja1
Raw data snails growth experiment at diferent Calcium concentrations
30 Jan			Sowing
		A			B			C
N	SIZE	WEIGHT	N	SIZE	WEIGHT	N	SIZE	WEIGHT
1	5	0.0304	1	4.2	0.0201	1	5	0.0302
2	4.5	0.0177	2	4.6	0.0207	2	5.9	0.0438
3	5.5	0.0443	3	4.9	0.0234	3	5	0.0373
4	5	0.0335	4	4.9	0.0193	4	4.9	0.02001
5	4.5	0.0298	5	4.5	0.0217	5	4.9	0.0243
6	4.8	0.026	6	5	0.0243	6	5.5	0.0482
7	5	0.0355	7	5	0.0245	7	5.5	0.0318
8	4.9	0.0267	8	5	0.0243	8	5.5	0.0388
9	5	0.0328	9	4.9	0.0195	9	5	0.0277
10	5.5	0.0328	10	4.9	0.0216	10	4.5	0.0256
11	4.9	0.0234	11	5	0.0219	11	4.9	0.022
12	5	0.0313	12	4.5	0.0233	12	5	0.0297
13	4.2	0.0187	13	4.2	0.0244	13	4.9	0.0343
14	4.5	0.0226	14	4	0.0197	14	5	0.0284
15	5	0.0322	15	4.5	0.0253	15	5	0.0245
16	5	0.022	16	4.9	0.0213	16	4	0.0146
17	5	0.0332	17	4.9	0.0218	17	4.5	0.0202
18	4.9	0.0345	18	4	0.0162	18	5.1	0.0498
19	5	0.0308	19	4.5	0.0193	19	5	0.0312
20	4.5	0.0318	20	4.2	0.0211	20	5	0.0339
21	5.2	0.0241	21	4.2	0.0187	21	4.9	0.0241
22	4.2	0.0454	22	4.5	0.0203	22	5	0.0267
23	5	0.0236	23	5	0.0227	23	4.9	0.022
24	4.5	0.039	24	4.5	0.0191	24	5	0.0336
25	5	0.032	25	4.5	0.0186	25	5	0.0246
26	4.5	0.0358	26	4.6	0.023	26	5	0.0312
27	5	0.0304	27	4	0.0152	27	5.2	0.0395
28	5	0.0304	28	4.9	0.0199	28	4.9	0.0225
29	5	0.0367	29	4.5	0.0151	29	4.9	0.0221
30	4.9	0.0316	30	4.2	0.0165	30	5	0.034
31	5	0.0355	31	5	0.0269	31	5	0.0247
32	5.9	0.0447	32	5.5	0.0273	32	5	0.0271
33	5.5	0.0454	33	5	0.0356	33	6	0.0213
34	6	0.0601	34	5	0.0275	34	5	0.0264
35	5	0.038	35	4.2	0.017	35	5.2	0.0297
36	6	0.0554	36	4.9	0.0239	36	5.5	0.0388
37	5.5	0.0575	37	5	0.0223	37	5.5	0.0424
38	5	0.042	38	4.5	0.0226	38	4.9	0.0224
39	5.5	0.048	39	4.9	0.0206	39	5	0.0314
40	5.5	0.0433	40	4.5	0.0207	40	5.2	0.0255
41	5.8	0.053	41	5	0.0238	41	4.9	0.0212
42	5	0.0431	42	4.5	0.0191	42	5	0.0363
43	5	0.0427	43	5	0.0272	43	4.9	0.0313
44	5	0.0303	44	5	0.0233	44	4.2	0.0188
45	5.2	0.0397	45	5.2	0.0265	45	4.5	0.0223
46	5	0.0302	46	5	0.0283	46	5	0.0265
47	5	0.0353	47	5	0.0359	47	5	0.026
48	4.9	0.0305	48	4.9	0.0227	48	5	0.0264
49	5.9	0.0409	49	4.5	0.0318	49	5	0.0409
50	6	0.055	50	5	0.0251	50	5	0.0365
51	4.5	0.0312	51	4	0.0196	51	4	0.0161
52	5	0.0437	52	5	0.025	52	4.9	0.0191
53	5	0.0386	53	5	0.0268	53	4.9	0.0215
54	4.9	0.037	54	5	0.0258	54	4.5	0.0195
55	5.1	0.0507	55	4.2	0.016	55	5	0.0366
56	5	0.0407	56	4.9	0.0247	56	5	0.03
57	5	0.0381	57	4	0.0174	57	4.9	0.0222
58	5	0.0407	58	5	0.0243	58	5	0.0271
59	5	0.0357	59	4.9	0.021	59	4.2	0.0225
60	5	0.0364	60	5	0.0247	60	5.1	0.0499
61	4.9	0.0321	61	5.1	0.0252	61	5	0.0221
62	5.5	0.0295	62	5	0.0327	62	5	0.04
63	5	0.0387	63	5	0.0265	63	5	0.0246
64	5	0.0283	64	5	0.0241	64	4.8	0.0275
65	4.9	0.0305	65	5	0.0251	65	5.5	0.0567
66	5	0.0315	66	5.2	0.0304	66	5	0.0321
67	5	0.024	67	4.9	0.0236	67	5	0.0253
68	6	0.0313	68	4.5	0.0208	68	5.8	0.0502
69	5.5	0.0394	69	5	0.0286	69	5	0.0443
70	4.9	0.0238	70	4.5	0.0222	70	5	0.0241
71	5.2	0.0391	71	4.9	0.0228	71	4.5	0.021
72	5	0.0259	72	4.8	0.0236	72	5	0.0281
73	5.5	0.0395	73	5	0.0329	73	4.9	0.0203
74	5	0.0287	74	5.2	0.0338	74	4.5	0.0201
75	5	0.028	75	4.9	0.025	75	4.5	0.0245
76	4.9	0.0218	76	4.5	0.0225	76	4	0.0139
77	5	0.0272	77	4.9	0.0266	77	4.2	0.015
78	5	0.0299	78	4.8	0.022	78	4.9	0.0238
79	5	0.0248	79	4.8	0.019	79	5	0.0301
80	5.1	0.0289	80	5.2	0.0326	80	5	0.0279
81	5	0.0282	81	5	0.0287	81	4	0.0177
82	5	0.0234	82	5	0.0228	82	5	0.0242
83	4.8	0.0197	83	4	0.0144	83	4.2	0.019
84	5	0.0283	84	4.8	0.0207	84	4.5	0.0232
85	5	0.0272	85	5	0.0297	85	5	0.036
86	4	0.0134	86	4.9	0.0251	86	4.9	0.0225
87	5.9	0.0363	87	5.1	0.0328	87	4.8	0.0215
88	4.2	0.0211	88	5	0.028	88	4.8	0.0198
89	4.9	0.023	89	4.9	0.0212	89	5	0.0249
90	5	0.0236	90	5	0.0288	90	4	0.0142
Mean	5.04889	0.0336611		4.76667	0.0236489		4.91111	0.028129
Standar deviation	0.398098	0.00922797		0.342168	0.0046403		0.385538	0.00890006
2017-02-14			15 days
		A			B			C
N	SIZE	WEIGHT	N	SIZE	WEIGHT	N	SIZE	WEIGHT
1	10.9	0.279	1	11.4	0.2671	1	9.9	0.232
2	11	0.2608	2	11.1	0.2539	2	9	0.2239
3	11.6	0.3411	3	13.1	0.3527	3	9.7	0.2337
4	9.8	0.2016	4	10.8	0.2665	4	9.6	0.1817
5	11	0.3048	5	11.7	0.2943	5	10	0.2062
6	10	0.2025	6	10.2	0.2116	6	10.7	0.2796
7	8.6	0.112	7	12.3	0.2811	7	10.1	0.1973
8	10.3	0.2396	8	9.2	0.1354	8	10	0.1738
9	10.5	0.2111	9	10.5	0.1833	9	10.1	0.1907
10	10.9	0.2335	10	9.1	0.1433	10	9.6	0.1788
11	10.1	0.178	11	11.6	0.2373	11	9.6	0.2009
12	10.3	0.1991	12	9.2	0.141	12	9.5	0.1894
13	10.6	0.2127	13	8.8	0.1339	13	10.4	0.2279
14	9.8	0.1722	14	11.1	0.2416	14	9.4	0.1689
15	9.4	0.213	15	9.9	0.1825	15	7.8	0.1074
16	8	0.1117	16	10.1	0.1934	16	10.3	0.2251
17	10.5	0.1908	17	9.6	0.1738	17	9.7	0.198
18	8.7	0.1356	18	11	0.2415	18	10.5	0.223
19	10.1	0.2164	19	9.3	0.1732	19	9.1	0.145
20	10.3	0.1885	20	10	0.195	20	9.7	0.1894
21	10.6	0.2106	21	10.3	0.1599	21	9.7	0.1609
22	9.6	0.2075	22	10.2	0.2216	22	9.9	0.1578
23	8.6	0.1485	23	8.9	0.1453	23	10.3	0.251
24	10.6	0.2159	24	8.5	0.1282	24	10.9	0.2509
25	10.5	0.1999	25	9.4	0.1641	25	10.2	0.1996
26	10.6	0.2197	26	9.9	0.1644	26	11.2	0.2886
27	7.3	0.0913	27	10.4	0.214	27	9.8	0.184
28	10.3	0.2256	28	10.7	0.1614	28	10	0.1945
29	9.2	0.1366	29	10.5	0.1994	29	8.5	0.0997
30	11.2	0.2615	30	8.7	0.1148	30	8	0.1069
31	10.3	0.2582	31	11.9	0.349	31	10.4	0.2309
32	13.1	0.4195	32	10.9	0.2388	32	10.8	0.2067
33	13.1	0.3693	33	12.3	0.3085	33	10.9	0.2769
34	12.3	0.3615	34	10.6	0.1982	34	11.6	0.2777
35	10.9	0.2373	35	10.9	0.216	35	10.9	0.3031
36	10.5	0.2304	36	10.8	0.2586	36	10.7	0.2628
37	10.1	0.1806	37	11.6	0.2934	37	11.8	0.3616
38	8.1	0.137	38	13	0.3208	38	13	0.3467
39	8.3	0.1586	39	12.5	0.33	39	9.9	0.1733
40	10	0.2077	40	10.1	0.1808	40	9.2	0.1669
41	9.5	0.1673	41	9.2	0.1732	41	11.2	0.2824
42	10.1	0.1925	42	10.1	0.1926	42	10.8	0.2802
43	9.1	0.1644	43	12.4	0.2881	43	11.1	0.2755
44	10.9	0.2839	44	10.5	0.1716	44	10.7	0.2315
45	8.9	0.1409	45	10.6	0.2089	45	8.8	0.1153
46	10.5	0.2601	46	11.9	0.2919	46	8.9	0.152
47	10	0.1875	47	10.3	0.2105	47	10.6	0.2558
48	10.3	0.1974	48	10.3	0.2006	48	10.4	0.1939
49	10.1	0.1924	49	10.8	0.184	49	10.7	0.2584
50	10	0.1831	50	10.3	0.2211	50	8.4	0.1171
51	12.4	0.3339	51	10.7	0.2661	51	9.7	0.2393
52	9.4	0.1722	52	10.3	0.2017	52	9.8	0.2212
53	10.4	0.2077	53	10.2	0.2043	53	9.7	0.1863
54	11.8	0.2977	54	10.3	0.1876	54	10.5	0.1982
55	9.9	0.2023	55	13.2	0.326	55	10.5	0.2617
56	10.6	0.1962	56	11.1	0.2763	56	9.8	0.1674
57	9.8	0.15	57	8.6	0.1091	57	9.1	0.1548
58	11	0.2187	58	8.3	0.1378	58	9.4	0.1687
59	9.7	0.1536	59	9.5	0.141	59	10.7	0.2677
60	10.6	0.1455	60	9.7	0.1855	60	11	0.2305
61	12.6	0.3281	61	13	0.3099	61	10.3	0.2496
62	9.4	0.1463	62	10.5	0.2114	62	11.3	0.2868
63	10.3	0.1905	63	10.1	0.1953	63	12.2	0.3427
64	9.3	0.1255	64	10.2	0.1801	64	10.8	0.2836
65	8	0.1344	65	9.9	0.1871	65	10.6	0.2481
66	9.3	0.1503	66	12.5	0.3898	66	10.2	0.2002
67	9.2	0.1437	67	10.1	0.222	67	8.7	0.1213
68	10	0.2407	68	11.2	0.2287	68	10	0.1934
69	9.5	0.1631	69	10.4	0.1842	69	11.5	0.2523
70	9.4	0.1589	70	11.8	0.2292	70	10.2	0.2319
71	9.1	0.1462	71	9.4	0.1777	71	10	0.2146
72	10.3	0.1917	72	11.2	0.1956	72	9.8	0.2273
73	9.8	0.1731	73	10.5	0.2119	73	9.9	0.202
74	9.1	0.1679	74	11.7	0.258	74	10.3	0.1741
75	9.9	0.1609	75	12.3	0.3616	75	9.6	0.2263
76	7.9	0.1011	76	10.3	0.204	76	8.9	0.1728
77	9	0.1412	77	10.6	0.1872	77	9.5	0.1689
78	8	0.1344	78	8.6	0.1297	78	11.4	0.2406
79	10.3	0.1765	79	10.2	0.1704	79	9.8	0.1523
80	8.7	0.1256	80	10.8	0.1879	80	7.8	0.1364
81	10.9	0.2782	81	10.4	0.1926	81	9.5	0.1866
82	10.3	0.2126	82	9.7	0.1895	82	9.8	0.1658
83	9.4	0.1439	83	9.1	0.1474	83	10.3	0.225
84	10.5	0.1798	84	9.2	0.1303	84	11.4	0.2668
85	9.3	0.16	85	9.5	0.131	85	9.4	0.1647
86	9.8	0.1722	86	10.6	0.2351	86	8.4	0.1252
87	10.1	0.1923	87	12	0.3052	87	8.2	0.1302
88	9	0.1702	88	10	0.1661	88	8.6	0.1314
89	10.1	0.1846	89	10.2	0.1532	89	9.8	0.1881
90	9.7	0.1738	90	10.5	0.2049	90	8.8	0.1475
Mean	10.0089	0.198847		10.5211	0.212494		10.0133	0.208751
Standar deviation	1.08541	0.0618671		1.11944	0.0615152		0.958369	0.0557549
29 february
				30 days
		A			B			C
N	SIZE	WEIGHT	N	SIZE	WEIGHT	N	SIZE	WEIGHT
1	17.6	1.3377	1	17.6	1.2857	1	16.2	1.0047
2	16.3	0.8918	2	16.5	0.9717	2	16.2	0.9219
3	19.7	1.6237	3	14.6	0.5754	3	14.5	0.6618
4	14.7	0.6165	4	15.4	0.748	4	15.4	0.698
5	16.4	0.9583	5	15.6	0.7457	5	17.2	1.0204
6	15.1	0.7151	6	15.6	0.728	6	16.6	0.9143
7	13.3	0.4286	7	16.8	0.8181	7	15.9	0.7466
8	15.6	0.8111	8	17.5	1.0308	8	14.6	0.5995
9	16.2	0.8859	9	15.2	0.6505	9	16.8	0.9836
10	16.7	1.0378	10	17.6	1.814	10	16.1	0.8675
11	15.7	0.8706	11	15.4	0.6892	11	16.9	0.8274
12	16	0.7421	12	15.6	0.7006	12	16.7	0.9197
13	16.2	0.7018	13	16.8	0.8684	13	16.8	0.7656
14	15.8	0.8492	14	15.8	0.6963	14	14.1	0.6205
15	14.3	0.6193	15	13	0.4315	15	14.9	0.6848
16	15.7	0.6839	16	16.1	0.8356	16	17.5	1.098
17	14.7	0.5657	17	15.3	0.6896	17	15.8	0.8246
18	14.7	0.4359	18	15.3	0.8113	18	14.8	0.4861
19	17.2	0.9723	19	15.5	0.716	19	14.5	0.552
20	15.6	0.773	20	15.3	0.7414	20	13.3	0.4728
21	15.4	0.6814	21	14.6	0.6195	21	13.9	0.4952
22	13	0.5536	22	15.8	0.7004	22	14.6	0.5385
23	14	0.606	23	14	0.5643	23	14.8	0.583
24	13	0.4427	24	15.7	0.7116	24	13.1	0.4486
25	14.7	0.725	25	15	0.6575	25	13.3	0.4576
26	13.8	0.5867	26	15.1	0.5982	26	14.5	0.6633
27	13.8	0.6644	27	17.3	0.7963	27	12.4	0.2787
28	15.6	0.694	28	13.9	0.484	28	13.8	0.5025
29	15.9	0.8505	29	15	0.6103	29	13.4	0.3985
30	14.4	0.575	30	14.2	0.523	30	12.5	0.65
31	16.1	0.9388	31	21.9	1.831	31	18.1	1.2548
32	14.7	0.6136	32	17.9	0.9437	32	16.5	0.9937
33	16.5	0.9136	33	19	1.2153	33	17.9	1.1218
34	16.2	0.8568	34	17.7	1.046	34	14.7	0.6742
35	19	1.3251	35	18.8	1.2431	35	15.3	0.7926
36	16.5	1.0152	36	19	1.2457	36	15.5	0.742
37	16.4	0.7159	37	18.1	1.3143	37	14.6	0.6609
38	17.1	1.0416	38	16.8	0.8489	38	16.9	1.026
39	18.4	1.0312	39	14.5	0.6294	39	17.4	1.0319
40	16.7	0.8829	40	17.6	1.118	40	13.8	0.5812
41	14.1	0.6131	41	18.9	1.3433	41	14.6	0.661
42	15.2	0.6592	42	17.6	1.1209	42	15.9	0.9551
43	18.6	1.1861	43	16.9	0.9929	43	17.7	1.233
44	13.9	0.5888	44	16.3	0.8458	44	16.6	1.0256
45	14.5	0.6296	45	16.4	1.0068	45	13.6	0.5438
46	16.8	0.8946	46	15.6	0.814	46	15.9	0.9202
47	15	0.6533	47	13.8	0.5949	47	14.4	0.6429
48	17.2	0.8866	48	17.7	1.0415	48	14.2	0.5768
49	14.5	0.6458	49	15.8	0.8152	49	16.1	0.8788
50	17.4	1.0554	50	16.6	0.8068	50	14.3	0.6146
51	15.4	0.6607	51	15.5	0.7053	51	16.6	0.8989
52	13.1	0.4451	52	16	0.8195	52	14.4	0.5993
53	14.1	0.57	53	16.3	0.7002	53	13.8	0.5822
54	14.5	0.4563	54	14.1	0.5629	54	15.5	0.7389
55	15.4	0.7792	55	14.9	0.6563	55	13.4	0.4912
56	15.2	0.7087	56	15.8	0.7381	56	14.9	0.5953
57	15.7	0.7818	57	15	0.6552	57	17.1	0.8971
58	15.5	0.816	58	14.6	0.5013	58	15	0.6851
59	13.9	0.4437	59	16.7	0.8942	59	14.4	0.5958
60	15.2	0.734	60	14.2	0.448	60	13.6	0.5374
61	17.6	1.204	61	18.9	1.2946	61	18.4	1.2359
62	17.2	1.0326	62	14.7	0.5414	62	16.2	0.8316
63	16	0.8537	63	16.3	0.8128	63	16	0.84
64	15.3	0.7924	64	17.2	1.0593	64	17.5	1.0223
65	15.5	0.7635	65	18	1.047	65	15.9	0.8386
66	14.4	0.6271	66	19.5	1.3157	66	14.7	0.6247
67	15.8	0.7924	67	16.5	0.9702	67	15.7	0.7838
68	17.4	0.9248	68	15.1	0.6925	68	14.3	0.5722
69	13.5	0.4916	69	14.8	0.5447	69	15.3	0.6945
70	16.3	0.9384	70	16.9	0.8254	70	16	1.1499
71	15.9	0.8409	71	15.5	0.7201	71	16.5	0.7968
72	17.4	0.9525	72	15.9	0.7697	72	15.6	0.6272
73	15.7	0.6715	73	15.7	0.8316	73	14.1	0.6177
74	13.9	0.626	74	16.3	0.8183	74	14.2	0.522
75	15.2	0.6374	75	17.6	1.1519	75	15.8	0.7124
76	17.1	0.9368	76	15.6	0.803	76	13.3	0.4426
77	14.8	0.6863	77	18.3	1.0701	77	14.3	0.4604
78	14.5	0.4978	78	17	0.9834	78	16.2	0.7983
79	14.3	0.5945	79	18.6	1.0755	79	15.6	0.8221
80	15.5	0.7729	80	16.6	0.6956	80	15.7	0.7843
81	14.5	0.6155	81	15	0.6014	81	13.1	0.4407
82	15.9	0.8222	82	16.4	0.8827	82	13.3	0.4527
83	15.7	0.7194	83	16.9	0.9992	83	16.1	0.8253
84	14.5	0.5796	84	16.7	0.9	84	13.6	0.5452
85	14.5	0.6305	85	14.8	0.6049	85	13.8	0.5244
86	13.9	0.4512	86	15	0.6816	86	13.8	0.4683
87	15	0.793	87	15.6	0.6905	87	14.3	0.4858
88	13.9	0.5287	88	13.3	0.4212	88	12.5	0.4178
89	12.5	0.3499	89	14.6	0.4316	89	12.9	0.395
90	14	0.4079	90	16.8	0.8533	90	13.9	0.4802
Mean	15.4622	0.755303		16.1911	0.837784		15.1378	0.716117
Standar deviation	1.3986	0.222788		1.53737	0.270085		1.42439	0.219245
2017-03-15
				45 days
		A			B			C
N	SIZE	WEIGHT	N	SIZE	WEIGHT	N	SIZE	WEIGHT
1	18.4	1.4391	1	23.6	2.8138	1	19.9	1.7123
2	20.8	2.193	2	19.6	1.6053	2	21	2.0848
3	22.2	2.0439	3	23.5	2.7396	3	20.2	2.0161
4	18.5	1.2711	4	22.9	2.8942	4	18.6	1.657
5	18.3	1.2969	5	19.4	1.7551	5	17.4	1.3271
6	23	2.2894	6	23.2	2.4284	6	15.9	0.9868
7	20.6	2.0436	7	21	1.9431	7	21.4	2.144
8	20.8	1.7678	8	25.4	3.4919	8	19.6	1.5295
9	18.8	1.5095	9	22.4	2.4891	9	20.9	2.0903
10	19.4	1.5356	10	22.6	2.2911	10	17.7	1.22
11	18.8	1.5943	11	23.2	2.6264	11	15.6	0.8391
12	19.7	1.9873	12	23	2.7236	12	16.4	0.9695
13	20.5	1.8844	13	20.1	1.6799	13	19.6	1.4315
14	20.5	2.2046	14	17.6	1.2551	14	18.6	1.3386
15	19	1.5425	15	22.8	2.6103	15	17.3	1.1629
16	20.8	1.9798	16	19.3	1.5302	16	18.3	1.439
17	17.4	1.2312	17	20.4	1.8215	17	20.2	1.9689
18	19.6	1.4387	18	21.7	2.0825	18	18.2	1.7739
19	16.2	1.0513	19	21.2	1.5519	19	21.5	2.0296
20	20.6	1.6604	20	23	2.9968	20	18	1.1573
21	16.3	1.1385	21	22	2.5833	21	16.9	1.0681
22	18.2	1.3504	22	22.5	2.3735	22	16.9	0.9704
23	15.7	0.9609	23	19.9	1.6416	23	16.6	1.1099
24	19.1	1.2629	24	21.4	1.8203	24	18	1.2532
25	17.2	1.1	25	19.6	1.8353	25	16.7	1.1545
26	19.6	1.7556	26	20.4	1.8185	26	17.1	1.1558
27	19.5	1.7116	27	22.2	2.1441	27	16.2	1.0086
28	19.1	1.5026	28	23.7	2.758	28	16.3	0.9969
29	18.1	1.3992	29	22.9	2.5583	29	16.8	1.0361
30	17.4	1.0767	30	17.5	1.1967	30	16.2	1.0386
31	20.1	1.7709	31	22.5	2.4951	31	20.7	1.955
32	18.5	1.0615	32	20.6	1.7265	32	20.3	1.5596
33	21.7	2.1346	33	23.1	2.4756	33	19.1	1.4561
34	20.7	2.3597	34	22.5	2.5655	34	20	1.8776
35	20.7	2.0631	35	21	1.7906	35	21	2.127
36	17.4	1.521	36	18.5	1.3972	36	19.6	1.3955
37	21.1	1.8583	37	18.8	1.5024	37	20.4	1.8572
38	19.5	1.47	38	21.7	2.0588	38	20.1	1.722
39	19.4	1.4402	39	20	1.8051	39	21.6	2.1362
40	23.2	2.4327	40	22.5	2.4884	40	18.2	1.4167
41	18.4	1.2296	41	21.6	1.9984	41	19.4	1.6556
42	20.9	1.9805	42	21.1	2.2804	42	21.9	2.2994
43	19.4	1.6935	43	19.6	1.5361	43	18.9	1.5203
44	22.1	2.0615	44	21.7	2.4521	44	20.2	1.4594
45	19.7	1.6756	45	20.1	1.7184	45	19.5	1.6006
46	22.5	2.3967	46	18.9	1.4119	46	16.2	1.0191
47	24	3.1837	47	18.5	1.6706	47	16.2	0.8944
48	20.8	2.1851	48	24	2.641	48	21.1	1.6767
49	24.9	2.9566	49	19.5	1.511	49	19.9	1.6826
50	17	1.1162	50	18.5	1.6045	50	16.8	1.1653
51	21.6	2.8094	51	20.9	1.886	51	19.8	1.5488
52	19.6	1.4301	52	21.2	2.3324	52	18.9	1.3558
53	21.7	2.2054	53	18.9	1.9333	53	16.5	1.0926
54	19.6	1.5096	54	20.2	2.1263	54	18.5	1.4457
55	19.6	1.5805	55	21.1	1.7654	55	17.9	1.3577
56	18.5	1.5663	56	18.9	1.1275	56	17	1.1993
57	19	1.4603	57	20.3	1.6201	57	15.8	1.0349
58	18.9	1.7617	58	17.4	1.0868	58	16.8	1.1271
59	17.5	1.3724	59	21.1	2.0461	59	18.9	1.2396
60	17.7	0.9922	60	21	2.0212	60	17.7	0.9052
61	19.9	2.0998	61	21	1.8557	61	21.6	2.3444
62	18.6	1.3005	62	23.3	2.615	62	19.9	1.6317
63	21.6	2.1835	63	21	2.4782	63	19.2	1.4665
64	22.5	2.0546	64	19.3	1.4888	64	19.7	1.6528
65	23.6	2.7241	65	22.2	2.4225	65	20	1.6082
66	20.6	1.5184	66	20.7	1.8972	66	20.4	1.7046
67	20.6	2.2175	67	25.2	3.9363	67	18.9	1.2989
68	20.4	1.5618	68	18.7	1.4794	68	22.8	2.8223
69	17.5	1.3109	69	22.5	2.2775	69	17.9	1.385
70	19.6	1.3914	70	19.1	1.508	70	22.8	2.5318
71	19.3	1.8906	71	23.2	2.4714	71	22.9	2.4984
72	19.7	1.4566	72	22.8	2.6895	72	20.4	1.7579
73	23.1	2.833	73	20	1.7122	73	18.3	1.2445
74	21.6	1.8027	74	19.3	1.3301	74	18.3	1.5338
75	22.1	1.9361	75	20.3	2.5084	75	19.2	1.5619
76	20.6	2.0169	76	20.3	2.1992	76	21.1	2.1613
77	22.9	2.6156	77	17.9	1.28	77	20.4	1.781
78	22.4	2.3728	78	20.3	2.0267	78	20.4	1.6729
79	20.1	1.5073	79	17.9	1.395	79	19.9	1.9067
80	20.9	2.0303	80	20.4	1.8903	80	18.8	1.3863
81	19.2	1.4382	81	18.1	1.3158	81	17.7	1.3694
82	20.6	1.8216	82	18.1	1.5359	82	19.2	1.3806
83	22.9	2.3031	83	17.6	1.212	83	18.6	1.3114
84	19.2	1.4288	84	20.7	1.9722	84	18.5	1.2804
85	19.2	1.2625	85	20.8	2.1062	85	18.1	1.3668
86	20.1	1.3537	86	18.7	1.6927	86	16.6	1.0385
87	18.5	1.5738	87	19.2	1.5255	87	17.7	1.2664
88	18.9	1.6136	88	17.8	1.3857	88	17.9	1.2173
89	19.5	1.335	89	20.3	1.547	89	18.1	1.3141
90	17.5	1.244	90	19	1.37	90	16.9	1.0063
Mean	19.9222	1.74112		20.7711	2.00287		18.8344	1.4995
Standar deviation	1.8381	0.478012		1.86892	0.547214		1.78131	0.415741
2017-03-30				60 days
		A			B			C
N	SIZE	WEIGHT	N	SIZE	WEIGHT	N	SIZE	WEIGHT
1	25	3.1843	1	27.6	4.0581	1	17.8	1.3681
2	22	2.805	2	25.3	3.6456	2	18.9	1.7644
3	28	5.2423	3	23.3	2.24	3	22.4	2.6732
4	24	3.583	4	25.9	3.8842	4	21.8	2.6766
5	23	3.225	5	26.6	3.9428	5	25	4.0246
6	24.5	3.1588	6	20.9	2.3567	6	17.3	1.3421
7	22	2.4823	7	26.3	4.4857	7	23.4	2.7526
8	22	2.3677	8	28.9	5.0339	8	18.8	1.7191
9	20.5	1.8311	9	22.7	2.9495	9	23.2	2.914
10	21.9	2.0578	10	23.8	3.2323	10	21.7	2.1351
11	23.7	2.8889	11	24.3	3.0568	11	22.5	2.5067
12	23.2	2.4413	12	25	2.9258	12	21	2.0541
13	22	2.454	13	22.9	3.1232	13	21.7	2.261
14	25.2	3.7994	14	27.5	4.4918	14	19.2	1.5792
15	23	2.4871	15	21.2	2.1699	15	18	1.4296
16	23.1	2.7035	16	25.7	3.694	16	23.6	2.9072
17	20.7	2.2321	17	27.3	4.6406	17	23.1	3.4648
18	22.3	2.992	18	27.1	4.5576	18	22	2.9364
19	27	3.9519	19	25	3.9468	19	20.6	2.1133
20	21.7	2.1358	20	28.7	4.9826	20	21.5	2.4942
21	23.2	2.804	21	26.3	3.9056	21	22.5	2.863
22	23.8	3.2321	22	23.9	2.6885	22	20.6	2.1806
23	21.8	2.373	23	24.3	3.409	23	20.4	2.145
24	19.7	2.003	24	26.1	4.3303	24	20.3	1.8923
25	21.1	2.1115	25	24.4	2.8848	25	21.8	2.0995
26	20.2	2.0008	26	26.2	3.5291	26	20.2	2.0148
27	22	2.4637	27	27.1	4.4126	27	18	1.5098
28	20.2	2.1114	28	20.8	2.2871	28	20.1	2.2803
29	22.1	2.5639	29	25.4	3.482	29	20.3	1.8453
30	20.3	2.3123	30	24.2	3.273	30	20	1.9223
31	21	3.1017	31	25.1	3.3437	31	22	2.6157
32	22.5	2.6141	32	28.4	4.9341	32	23.2	2.5316
33	26	5.7288	33	29.2	5.6476	33	23.8	2.8941
34	25	4.1904	34	26.4	3.7478	34	18.7	1.6079
35	24	3.4958	35	25.3	3.9467	35	20	1.9095
36	22.9	2.5974	36	24.1	2.8383	36	23.4	2.5651
37	21.2	2.3204	37	21.7	2.3321	37	21.9	2.4815
38	22.4	3.5794	38	22.7	2.5757	38	20.3	1.892
39	22.3	2.9539	39	22.9	2.667	39	22.5	2.8532
40	21.1	2.4022	40	28.5	2.2734	40	22.7	2.3303
41	22.5	3.1413	41	24.4	2.5268	41	24.8	3.4116
42	21.9	2.4153	42	23	2.6911	42	18.8	1.7003
43	23.3	3.2312	43	25.2	2.3497	43	21	1.892
44	20.5	2.0313	44	26.8	3.9652	44	22.5	2.5971
45	21.3	2.316	45	24.2	3.2082	45	23.5	2.9749
46	22.7	2.963	46	22.9	3.044	46	21.3	2.544
47	22	2.5683	47	24.1	3.5984	47	13.2	1.2335
48	21.2	2.3114	48	22	2.6396	48	24.1	3.6376
49	23.9	2.6354	49	23.3	3.1476	49	23.6	3.35
50	21.9	3.0323	50	23.8	3.1731	50	21.4	2.1353
51	22.3	2.293	51	23.3	2.763	51	23.6	3.3139
52	22	2.904	52	22	2.4898	52	24	3.2288
53	23.2	2.999	53	23.6	2.9316	53	23.3	3.1631
54	24.7	3.4739	54	24.8	2.9789	54	21.5	2.5336
55	20.4	2.0032	55	24.6	3.2168	55	21.7	1.9682
56	21.2	2.1328	56	23.4	3.4269	56	23.2	2.9662
57	22.8	2.8823	57	23.7	2.6176	57	20.2	2.008
58	22.6	2.3371	58	21.7	2.3348	58	19.7	1.626
59	21.8	2.3211	59	20.2	1.9584	59	18.8	1.309
60	25.1	3.9979	60	27.5	2.9883	60	20.2	1.9148
61	21	2.1915	61	27	4.3017	61	27.1	4.0073
62	24.7	3.3847	62	27.5	5.833	62	22	2.4153
63	25	3.6695	63	25	3.3141	63	21.3	2.2567
64	23.5	2.8458	64	25.9	4.171	64	24.4	3.5802
65	22.7	3.211	65	26.9	3.9584	65	21.5	2.4976
66	23	2.949	66	22.8	2.4523	66	23.5	3.2145
67	21.4	2.1879	67	23	2.5257	67	24.5	3.5008
68	21.7	2.792	68	25.2	3.7145	68	21.1	2.3455
69	22.3	3.1493	69	24.5	3.5401	69	23.7	2.7042
70	20.5	2.094	70	21.7	2.4714	70	17.8	1.4849
71	23	2.7665	71	24.8	3.9122	71	23.2	2.8016
72	24.1	2.814	72	24.4	3.1808	72	25.9	4.7562
73	20.5	2.115	73	24.3	3.0546	73	24.2	3.3458
74	22	2.5197	74	21.9	2.3592	74	22.1	2.2844
75	19.4	1.9082	75	21	2.1616	75	21.8	2.4693
76	22.8	2.3599	76	21.6	2.3904	76	22.2	2.4726
77	20.7	2.3433	77	22	2.6748	77	21.9	2.3781
78	22.3	2.7035	78	24.3	3.1546	78	20.8	1.9701
79	22.7	2.8152	79	23.8	3.0883	79	24.2	2.9639
80	24	3.1209	80	26.1	3.8898	80	24.4	3.2476
81	23.7	3.1546	81	31.9	3.5499	81	24.9	3.5613
82	20.5	2.0471	82	35.3	6.4861	82	20	1.8113
83	22	2.9074	83	29.8	3.5504	83	23.7	3.1604
84	23.5	3.2534	84	26.8	2.3738	84	22.3	2.6938
85	21	2.2317	85	31.7	4.2597	85	20.7	2.3542
86	19.6	1.5305	86	30.9	3.6476	86	22.5	2.8099
87	20.9	2.3323	87	29.4	2.9654	87	22.8	2.717
88	20.7	1.9023	88	27.7	2.7787	88	20.9	2.2162
89	22.2	2.2431	89	28.6	3.2573	89	22.3	3.0953
90	22.5	2.47002	90	25.2	2.0361	90	18.3	1.5257
Mean	22.4311	2.74429		25.1611	3.34477		21.6956	2.48555
Standar deviation	1.61799	0.682101		2.73219	0.890157		2.18657	0.690509
2017-04-14				75 days
		A			B			C
N	SIZE	WEIGHT	N	SIZE	WEIGHT	N	SIZE	WEIGHT
1	22.1	3.4103	1	28.7	5.219	1	20.8	2.6705
2	22.7	3.274	2	32.8	8.2244	2	20.4	1.9655
3	22.2	2.8649	3	29	5.432	3	25.9	4.3424
4	21.1	2.5539	4	26.7	3.6862	4	24.2	3.0623
5	20.7	2.3598	5	29.9	5.1743	5	21.9	2.513
6	21.5	2.5693	6	26.8	4.013	6	19	1.5842
7	22.7	2.8213	7	27.8	4.9171	7	23.5	3.2218
8	20.3	2.2614	8	29.2	5.8649	8	25.9	3.9736
9	26.3	4.9156	9	28.8	4.7164	9	23	3.3474
10	21.3	2.6162	10	28.1	5.4534	10	24.2	3.9632
11	21.8	2.4887	11	25.8	4.1513	11	29.2	7.4672
12	23	3.0737	12	26.7	4.4346	12	22.9	2.882
13	22.5	2.4516	13	27.6	4.5801	13	23.3	3.0138
14	21	2.321	14	30.9	6.0596	14	23.3	3.2373
15	25	3.8997	15	27.2	4.657	15	24.3	3.9556
16	22	2.5726	16	32.6	8.5927	16	23.1	2.5598
17	23.3	3.1613	17	27.9	4.5629	17	19.8	1.899
18	24.9	4.1028	18	28.3	4.8242	18	23.7	2.8901
19	23.8	3.6141	19	24.7	3.0457	19	25.1	4.5673
20	21.2	2.8813	20	26	4.0736	20	18.9	1.7951
21	26.9	4.579	21	29.8	6.1809	21	23.3	2.9839
22	25.4	4.3335	22	29.6	6.0048	22	24.4	3.6073
23	24.2	3.6243	23	31.5	8.1023	23	23.2	3.1128
24	21.3	2.3156	24	26.7	4.552	24	21.6	2.5822
25	22.7	3.0095	25	31.6	7.0112	25	22.7	3.0347
26	22	2.4368	26	28	4.7951	26	22.2	2.8487
27	20.4	2.159	27	29.7	6.12	27	22	2.9769
28	20.7	2.1172	28	25.7	3.6064	28	21.8	2.3527
29	19.8	2.0163	29	25	3.4452	29	23.4	3.0634
30	19.5	2.351	30	26.8	4.4826	30	19.6	1.9259
31	31.1	8.2955	31	31.7	6.7337	31	24.3	3.2116
32	25.7	3.6628	32	30.6	6.9963	32	24.9	3.6036
33	23.8	3.3655	33	28.3	5.2076	33	23	3.0312
34	31.6	6.8697	34	23.8	3.1679	34	22.6	2.6503
35	24.4	2.9983	35	26.4	4.3962	35	23.7	2.8751
36	21.6	2.9046	36	31.2	7.2286	36	22.8	2.7976
37	25	3.2276	37	31.2	6.3368	37	23.7	3.0208
38	24	3.2116	38	25.6	3.6658	38	21.2	2.0529
39	24.9	3.4583	39	25.4	3.612	39	23.4	3.0062
40	23.5	3.017	40	27.4	5.5485	40	23	2.8861
41	22.3	2.3871	41	24.9	3.8091	41	23.7	3.3083
42	25.6	4.9114	42	26.6	4.646	42	28	4.7668
43	24.4	3.8024	43	31	6.5587	43	22.8	2.8529
44	26.3	4.3628	44	25.9	3.9566	44	26.4	4.1982
45	23.9	3.1208	45	26.5	3.7566	45	24	2.8143
46	24.6	3.037	46	26.1	3.9588	46	23.7	3.6403
47	22.9	2.6473	47	28	5.1539	47	21.9	2.6411
48	25.7	4.148	48	28.6	6.406	48	22.6	2.6675
49	25.3	3.9518	49	28.1	5.0606	49	18.1	1.3505
50	23.5	4.433	50	27	4.475	50	25.2	4.2577
51	25.7	3.678	51	25.1	3.5296	51	24.6	3.8031
52	22	2.9783	52	27.2	4.1109	52	26.2	3.6972
53	24.9	4.12	53	30.3	6.1304	53	22.2	2.8139
54	23.3	3.0073	54	26.5	4.1312	54	24.2	3.1371
55	23.7	2.898	55	27.9	4.9557	55	25	3.6827
56	24.3	3.0767	56	26.7	4.8864	56	22.3	2.2723
57	25.4	3.4605	57	27.9	5.0502	57	22.4	2.4353
58	23.5	2.8864	58	23.3	3.1012	58	21.8	2.0899
59	23.5	3.4232	59	23.3	3.5718	59	22.7	3.0608
60	21.6	2.4822	60	24.3	3.5824	60	20.1	2.163
61	23.3	3.1922	61	27.5	5.1927	61	26.5	4.0254
62	27.6	4.8437	62	27.6	4.6377	62	24.1	3.3742
63	25.1	3.5721	63	30.7	7.7381	63	23.2	2.9332
64	24.5	3.4373	64	22	2.9045	64	25.7	3.934
65	23.9	3.4475	65	25.3	4.3495	65	23.4	2.7647
66	24.8	4.475	66	29.6	6.4578	66	22	2.4641
67	24.5	3.6756	67	26	4.1583	67	23.4	2.8218
68	23.2	3.1247	68	28.2	4.9162	68	21.7	2.338
69	22.2	2.5487	69	27.6	4.4135	69	23.3	2.7601
70	23.5	3.0051	70	26.7	4.7792	70	24.7	3.2878
71	21.9	3.2613	71	24.8	3.5778	71	24.7	3.6484
72	21.3	2.286	72	30.1	6.1976	72	19.7	1.8414
73	27.3	4.2778	73	26.1	4.2821	73	22.5	2.5472
74	26.2	3.9592	74	25.4	3.8153	74	27.7	5.2433
75	25.8	3.7403	75	27.5	4.7037	75	23.5	2.8263
76	31.3	7.5388	76	27.3	4.7353	76	23.6	3.0515
77	26	4.4051	77	25.9	4.0114	77	24.8	3.3967
78	24.8	4.3356	78	25.9	3.9217	78	24.4	3.6165
79	26.2	4.5854	79	27.9	5.3176	79	24.8	3.8734
80	22.7	3.4508	80	22.8	2.9476	80	25.6	3.2894
81	23.7	3.005	81	30.4	7.0174	81	24.5	3.174
82	24.9	4.0085	82	31.8	7.1044	82	24	3.6788
83	23.5	3.5182	83	25.7	4.0285	83	21	2.3357
84	22.6	3.4507	84	29.3	7.2574	84	20	2.0409
85	23.9	3.2116	85	27.3	4.5681	85	24.5	3.0428
86	23.4	3.1499	86	27.4	5.3456	86	22.5	2.7334
87	24.6	2.9139	87	27.4	4.3185	87	21.9	2.3625
88	24.3	3.3133	88	26.6	4.4663	88	24.8	3.6396
89	23	2.8212	89	25.1	3.5987	89	21.9	2.295
90	23.5	2.646	90	27	4.1088	90	22.3	2.907
Mean	23.82	3.42421		27.5511	4.93976		23.2644	3.0715
Standar deviation	2.2455	1.0497		2.27785	1.28402		1.9707	0.855328
2017-04-29				90 days
		A			B			C
N	SIZE	WEIGHT	N	SIZE	WEIGHT	N	SIZE	WEIGHT
1	28.1	6.1886	1	31	6.331	1	26.9	5.0937
2	27.3	4.7556	2	32.1	7.8187	2	27.9	4.5545
3	26.7	5.2076	3	34.7	8.312	3	24.8	3.6354
4	25.5	3.8363	4	31.6	6.9769	4	24.3	3.7072
5	25	4.6975	5	26.4	4.2642	5	26.2	4.765
6	25.5	4.4094	6	26.2	4.5497	6	28.3	5.6341
7	27.3	5.1706	7	28.8	4.9421	7	25.1	3.5565
8	25.5	4.0397	8	28.3	5.1266	8	29.1	5.7198
9	22	2.9114	9	29.8	6.4857	9	26.2	4.0048
10	22.8	3.347	10	29.2	6.0946	10	25.4	4.4396
11	23.6	3.2152	11	30	6.6851	11	25.4	4.0493
12	22.8	3.1581	12	28.7	5.8096	12	22.8	2.9501
13	22.9	2.8415	13	30.2	6.6852	13	22.1	2.6798
14	22.9	3.6324	14	31.1	7.9337	14	21.8	2.6113
15	23.4	3.6351	15	29.3	5.9858	15	22.8	3.1865
16	30.4	7.0304	16	29.9	6.1825	16	24.4	3.7943
17	23.6	2.9287	17	28.5	5.3727	17	30.3	6.5495
18	25.5	4.0426	18	35	9.7833	18	23.4	3.139
19	26.1	4.7228	19	28.8	6.0012	19	23.1	3.366
20	22.7	2.8155	20	27.1	4.8133	20	30.7	7.5844
21	24.4	4.0178	21	30.5	6.1875	21	26.7	5.2892
22	23.5	3.2582	22	33.2	9.1044	22	26.3	4.635
23	25	3.5854	23	33.6	9.5692	23	24	3.576
24	19.7	2.5974	24	35.4	10.5921	24	28.1	5.835
25	22.6	3.5021	25	30	6.6424	25	25.1	3.6035
26	22.4	3.6294	26	29	5.4806	26	21.9	2.5503
27	20.4	2.815	27	28.6	5.718	27	22.6	3.1185
28	22.1	2.685	28	29.5	7.0105	28	24	3.1314
29	20.6	2.9271	29	28.5	5.7246	29	21.1	2.2418
30	25.4	3.6034	30	28.4	5.1902	30	24.4	3.9949
31	25.7	4.5643	31	27	5.6868	31	29.1	6.4736
32	25.7	4.8721	32	28.3	6.0973	32	29.2	6.5366
33	26.7	4.2842	33	31	6.2673	33	31.1	7.5949
34	23.8	3.6092	34	25.5	4.3274	34	24.6	3.741
35	23.8	3.4837	35	28.2	5.4624	35	24.6	4.5056
36	31	9.6042	36	33.8	7.5843	36	22.5	3.6033
37	23.5	3.5908	37	25.2	3.8741	37	22.9	2.9833
38	26.2	4.8733	38	25.4	3.889	38	20.9	2.9482
39	31.7	6.8647	39	26.7	4.7408	39	21.7	2.8017
40	25.7	3.6592	40	25.5	4.4838	40	22.9	3.3149
41	24.5	3.609	41	25.7	4.126	41	24.6	3.8509
42	27.2	6.0026	42	24.8	3.8658	42	26.1	4.6751
43	25.1	4.3804	43	31.3	8.1392	43	26.4	5.0802
44	24.7	3.9184	44	35.2	9.0676	44	21.9	3.167
45	23.5	4.0247	45	30.9	7.4234	45	25	4.328
46	24.1	3.2414	46	31.5	7.7984	46	25.9	5.0468
47	24.5	3.5806	47	32.9	8.4335	47	24.7	3.9252
48	24.6	4.1951	48	30.4	7.1195	48	26.2	4.6283
49	29.9	6.4396	49	27.3	5.153	49	23.3	3.0275
50	23.8	3.3272	50	27.9	6.0178	50	23.2	3.141
51	23.4	3.143	51	24.4	3.691	51	22.7	3.0259
52	23	2.9803	52	25.7	3.779	52	23.9	4.0966
53	26.1	3.9214	53	28.8	5.9161	53	24.6	3.9993
54	26.2	4.588	54	25.1	4.0269	54	22.3	2.7023
55	27.6	4.6299	55	25.8	4.2048	55	24.4	3.9737
56	23.6	3.292	56	27.4	5.1886	56	23.3	2.8919
57	27.1	4.8868	57	25.6	4.2225	57	21.8	2.5867
58	24.2	3.5026	58	26.6	4.231	58	22.3	2.9092
59	25.4	3.426	59	26.2	4.2602	59	23.9	4.0806
60	24	3.7768	60	27.7	5.1676	60	26.2	4.1622
61	30.1	5.6212	61	31.8	8.8874	61	29.2	5.667
62	25.6	3.8272	62	30.5	7.5171	62	25.1	4.503
63	26.6	5.2868	63	31	7.1673	63	25.5	4.1671
64	24.9	4.1542	64	29.4	6.3289	64	28	6.1532
65	26.7	4.9561	65	26.2	5.2309	65	26.7	5.1924
66	22.9	3.2685	66	27.3	6.0936	66	28	5.8891
67	24.2	3.1748	67	31.7	8.6266	67	24.9	3.9643
68	25.4	4.1002	68	31.5	7.9788	68	27	4.816
69	27.3	5.2591	69	23.8	3.9406	69	24	3.3711
70	24	3.3392	70	22.8	3.1781	70	27	4.8237
71	23.3	4.1404	71	28.6	6.7682	71	21.8	3.1174
72	23.9	3.7948	72	33.9	9.7947	72	26	4.5344
73	24	3.966	73	28.5	5.6273	73	24.9	3.5704
74	24.1	2.744	74	28.7	5.5974	74	30	6.4331
75	24.1	3.4808	75	27.8	5.9069	75	25.3	4.6197
76	22.5	2.5638	76	30.5	5.9872	76	26.5	4.6052
77	22	2.7344	77	27.1	5.2198	77	30.1	6.4807
78	22.8	3.005	78	25.7	4.4461	78	26.7	4.3617
79	31	6.6596	79	29.5	7.1816	79	23.7	2.9238
80	30	5.6172	80	27.3	5.5778	80	23.8	4.3001
81	25.6	4.336	81	31.3	8.9887	81	27.6	5.3032
82	29.8	6.2686	82	29.5	6.8425	82	25.3	3.9337
83	28.3	5.4887	83	26.1	3.6483	83	25.1	4.6842
84	28.9	6.8512	84	31.8	7.731	84	22.8	3.3499
85	28.9	5.9292	85	27	5.0493	85	24.2	3.4428
86	27.1	4.9667	86	26	4.4698	86	22.7	2.9488
87	29.9	6.1381	87	25	3.8707	87	23.8	3.2668
88	25.1	4.5924	88	26.6	4.6057	88	22.9	3.5979
89	25.6	4.2704	89	28.5	6.189	89	23.6	3.4937
90	23.6	3.1374	90	24.7	4.2671	90	21	3.0576
Mean	25.2244	4.21278		28.7922	6.04819		25.0067	4.14855
Standar deviation	2.5043	1.24548		2.80726	1.68297		2.41586	1.17682
